# Supplementary material for: Reduced DNA Repair Capacity in Prostate Cancer Patients: A Phenotypic Approach Using the CometChip
Source: MDPI journal article supplement (doi:10.3390/cancers14133117), 2022-06-25
Supplement: s1 [file s1]

# Reduced DNA Repair Capacity in Prostate Cancer Patients: A Phenotypic Approach Using the CometChip

Carmen Ortiz-Sánchez, Jarline Encarnación-Medina, Jong Y. Park, Natasha Moreno, Gilberto Ruiz-Deya and Jaime Matta

**Table S1.** DNA repair capacity values for the study cohort including Puerto Rican men with and without prostate cancer.

| Study ID | Type    | DRC Results (%) |
|----------|---------|-----------------|
| CONT-010 | control | 16.47           |
| CONT-013 | control | 23.42           |
| CONT-014 | control | 16.92           |
| CONT-015 | control | 29.17           |
| CONT-016 | control | 38.88           |
| CONT-017 | control | 15.42           |
| CONT-018 | control | 32.38           |
| CONT-020 | control | 13.67           |
| CONT-021 | control | 16.87           |
| CONT-022 | control | 13.76           |
| CONT-023 | control | 22.13           |
| CONT-024 | control | 13.94           |
| CONT-025 | control | 22.82           |
| CONT-027 | control | 13.37           |
| PCA-001  | case    | 16.71           |
| PCA-003  | case    | 11.22           |
| PRP-002  | case    | 3.03            |
| PRP-005  | case    | 6.40            |
| PRP-006  | case    | 11.91           |
| PRP-008  | case    | 2.51            |
| PRP-009  | case    | 5.10            |
| PRP-012  | case    | 6.17            |
| PRP-026  | case    | 9.61            |
| PRP-027  | case    | 10.04           |
| PRP-039  | case    | 6.33            |
| PRP-046  | case    | 10.79           |
| PRP-063  | case    | 1.47            |
| PRP-080  | case    | 1.69            |
| PRP-081  | case    | 9.01            |
| PRP-100  | case    | 6.00            |
| PRP-128  | case    | 1.44            |
| PRP-129  | case    | 9.59            |
| PRP-130  | case    | 6.73            |
| PRP-131  | case    | 11.51           |
| PRP-140  | case    | 14.38           |
| PRP-143  | case    | 5.60            |
| PRP-158  | case    | 15.52           |
| PRP-159  | case    | 6.25            |
| PRP-160  | case    | 13.99           |
| PRP-161  | case    | 6.74            |
| PRP-163  | case    | 3.12            |
| PRP-165  | case    | 17.07           |

|         |      |       |
|---------|------|-------|
| PRP-166 | case | 1.95  |
| PRP-168 | case | 11.77 |
| PRP-169 | case | 13.73 |
| PRP-170 | case | 5.09  |
| PRP-171 | case | 4.26  |
| PRP-172 | case | 9.10  |
| PRP-174 | case | 9.12  |
| PRP-175 | case | 4.99  |
| PRP-176 | case | 12.73 |
| PRP-177 | case | 11.52 |
| PRP-178 | case | 3.33  |
| PRP-179 | case | 21.90 |
| PRP-180 | case | 5.27  |

**Table S2.** DNA repair capacity values for Puerto Rican men with indolent and aggressive prostate cancer.

| Study Cohort | Type | Disease aggressiveness | DRC Results (%) |
|--------------|------|------------------------|-----------------|
| PRP-012      | case | Indolent               | 6.17            |
| PRP-080      | case | Indolent               | 1.69            |
| PRP-081      | case | Indolent               | 9.01            |
| PRP-168      | case | Indolent               | 11.77           |
| PRP-171      | case | Indolent               | 4.26            |
| PRP-172      | case | Indolent               | 9.10            |
| PRP-180      | case | Indolent               | 5.27            |
| PRP-100      | case | Indolent               | 6.00            |
| PRP-129      | case | Indolent               | 9.59            |
| PRP-131      | case | Indolent               | 11.51           |
| PRP-166      | case | Indolent               | 1.95            |
| PRP-169      | case | Indolent               | 13.73           |
| PRP-170      | case | Indolent               | 5.09            |
| PRP-176      | case | Indolent               | 12.73           |
| PRP-177      | case | Indolent               | 11.52           |
| PRP-178      | case | Indolent               | 3.33            |
| PRP-179      | case | Indolent               | 21.90           |
| PRP-009      | case | Aggressive             | 5.10            |
| PRP-039      | case | Aggressive             | 6.33            |
| PRP-130      | case | Aggressive             | 6.73            |
| PRP-140      | case | Aggressive             | 14.38           |
| PRP-161      | case | Aggressive             | 6.74            |
| PRP-165      | case | Aggressive             | 17.07           |
| PRP-174      | case | Aggressive             | 9.12            |
| PRP-175      | case | Aggressive             | 4.99            |
| PRP-002      | case | Aggressive             | 3.03            |
| PRP-063      | case | Aggressive             | 1.47            |
| PRP-158      | case | Aggressive             | 15.52           |
| PCA-001      | case | Aggressive             | 16.71           |
| PRP-005      | case | Aggressive             | 6.40            |
| PRP-006      | case | Aggressive             | 11.91           |
| PRP-008      | case | Aggressive             | 2.51            |
| PRP-027      | case | Aggressive             | 10.04           |
| PRP-046      | case | Aggressive             | 10.79           |
| PRP-128      | case | Aggressive             | 1.44            |
| PRP-143      | case | Aggressive             | 5.60            |
| PRP-163      | case | Aggressive             | 3.12            |
| PCA-003      | case | Aggressive             | 11.22           |
| PRP-026      | case | Aggressive             | 9.61            |

|         |      |            |       |
|---------|------|------------|-------|
| PRP-160 | case | Aggressive | 13.99 |
|---------|------|------------|-------|
